# Supplementary material for: Characterization and Control of Dendrobium officinale Bud Blight Disease
Source: MDPI journal article supplement (doi:10.3390/pathogens12040621), 2023-04-20
Supplement: s1 [file s1]

Table S1. GenBank accession numbers of strains used to identify *Ectophoma* strain in the phylogenetic analyses.

| Species                                              | Strain number  | GenBank accession numbers |          |             |             |
|------------------------------------------------------|----------------|---------------------------|----------|-------------|-------------|
|                                                      |                | ITS                       | LSU      | <i>tub2</i> | <i>rpb2</i> |
| <i>Allocucurbitaria botulispora</i> CBS 142452       | CBS 142452     | LT592932                  | LN907416 | LT593001    | LT593070    |
| <i>Allophoma cylindrispora</i> CBS 142453            | CBS 142453     | LT592920                  | LN907376 | LT592989    | LT593058    |
| <i>A. minor</i> CBS 325.82                           | CBS 325.82     | GU237831                  | GU238107 | GU237632    | KT389553    |
| <i>A. nicaraguensis</i> CBS 506.91                   | CBS 506.91     | GU237876                  | GU238058 | GU237596    | KT389551    |
| <i>A. oligotrophica</i> CBS 497.91                   | CBS 497.91     | KY742040                  | KY742194 | KY742282    | KY742128    |
| <i>A. piperis</i> CBS 268.93                         | CBS 268.93     | GU237816                  | GU238129 | GU237644    | KT389554    |
| <i>A. tropica</i> CBS 436.7                          | CBS 436.7      | GU237864                  | GU238149 | GU237663    | KT389556    |
| <i>Alternariaster bidentis</i> CBS 134021            | CBS 134021     | KC609333                  | KC609341 | /           | KC609347    |
| <i>Briansuttonomyces eucalypti</i> CBS 114879        | CBS 114879     | KU728479                  | KU728519 | KU728595    | /           |
| <i>Calophoma clematidina</i> CBS 108.79              | CBS 108.79     | FJ426989                  | FJ515632 | FJ427100    | KT389588    |
| <i>C. clematidis-rectae</i> CBS 507.63               | CBS 507.63     | FJ515606                  | FJ515647 | FJ515624    | KT389589    |
| <i>C. rosae</i> CGMCC 3.18347                        | CGMCC 3.18347  | KY742049                  | KY742203 | KY742291    | KY742135    |
| <i>Camarosporidiella aborescentis</i> MFLUCC 14-0604 | MFLUCC 14-0604 | KP711377                  | KP711378 | /           | /           |
| <i>Camarosporidiella aborescentis</i> MFLUCC 14-0238 | MFLUCC 14-0238 | KP120926                  | KP120927 | /           | /           |
| <i>C. aureum</i> MFLUCC 14-0620                      | MFLUCC 14-0620 | KP744436                  | KP744478 | /           | /           |
| <i>C. clematidis</i> MFLUCC 13-0336                  | MFLUCC 13-0336 | KJ562213                  | KJ562188 | /           | /           |
| <i>Camarosporium quaternatum</i> CBS 142616          | CBS 142616     | KY929171                  | KY929136 | /           | /           |
| <i>Camarosporomyces flavigenus</i> CBS 314.80        | CBS 314.80     | KY929138                  | GU238076 | /           | /           |
| <i>Cucurbitaria berberidis</i> CBS 130007            | CBS 130007     | LT717673                  | KC506793 | LT717676    | LT854936    |
| <i>Cumuliphoma indica</i> CBS 654.77                 | CBS 654.77     | FJ427043                  | GU238122 | FJ427153    | LT623261    |
| <i>C. omnivirens</i> CBS 341.86                      | CBS 341.86     | FJ427042                  | LT623214 | FJ427152    | LT623260    |
| <i>C. pneumoniae</i> CBS 142454                      | CBS 142454     | LT592925                  | LN907392 | LT592994    | /           |
| <i>Didymella aerea</i> CGMCC 3.18353                 | CGMCC 3.18353  | KY742051                  | KY742205 | KY742137    | KY742293    |
| <i>D. aquatica</i> CGMCC 3.18349                     | CGMCC 3.18349  | KY742055                  | KY742209 | KY742297    | KY742140    |
| <i>D. arachidicola</i> CBS 333.75                    | CBS 333.75     | GU237833                  | GU237996 | GU237554    | KT389598    |
| <i>D. aurea</i> CBS 269.93                           | CBS 269.93     | GU237818                  | GU237999 | GU237557    | KT389599    |
| <i>D. boeremae</i> CBS 109942                        | CBS 109942     | FJ426982                  | GU238048 | FJ427097    | KT389600    |
| <i>D. brunneospora</i> CBS 115.58                    | CBS 115.58     | KT389505                  | KT389723 | KT389802    | KT389625    |
| <i>D. chloroguttulata</i> CGMCC 3.18351              | CGMCC 3.18351  | KY742057                  | KY742211 | KY742299    | KY742142    |
| <i>D. coffeae-arabicae</i> CBS 123380                | CBS 123380     | FJ426993                  | GU238005 | FJ427104    | KT389603    |
| <i>D. ellipsoidea</i> CGMCC 3.18350                  | CGMCC 3.18350  | KY742060                  | KY742214 | KY742302    | KY742145    |
| <i>D. exigua</i> CBS 183.55                          | CBS 183.55     | GU237794                  | EU754155 | GU237525    | EU874850    |
| <i>D. gardeniae</i> CBS 626.68                       | CBS 626.68     | FJ427003                  | GQ387595 | FJ427114    | KT389606    |
| <i>D. glomerata</i> CBS 528.66                       | CBS 528.66     | FJ427013                  | JX681105 | FJ427124    | GU371781    |

|                                                 |                              |           |          |          |          |
|-------------------------------------------------|------------------------------|-----------|----------|----------|----------|
| <i>D. heteroderae</i> CBS 109.92                | CBS 109.92                   | FJ426983  | GU238002 | FJ427098 | KT389601 |
| <i>D. ilicicola</i> CGMCC 3.18355               | CGMCC 3.18355                | KY742065  | KY742219 | KY742307 | KY742150 |
| <i>D. infuscatipora</i> CGMCC 3.18356           | CGMCC 3.18356                | KY742067  | KY742221 | KY742309 | /        |
| <i>D. keratinophila</i> CBS 143032              | CBS 143032                   | LT592901  | LN907343 | LT592970 | LT593039 |
| <i>D. macrophylla</i> CGMCC 3.18357             | CGMCC 3.18357                | KY742070  | KY742224 | KY742312 | KY742154 |
| <i>D. maydis</i> CBS 588.69                     | CBS 588.69                   | FJ427086  | EU754192 | FJ427190 | GU371782 |
| <i>D. microchlamydospora</i> CBS 105.95         | CBS 105.95                   | FJ427028  | GU238104 | FJ427138 | KP330424 |
| <i>D. ocimicola</i> CGMCC 3.18358               | CGMCC 3.18358                | KY742078  | KY742232 | KY742320 | /        |
| <i>D. pedeiae</i> CBS 124517                    | CBS 124517                   | GU237770  | GU238127 | GU237642 | /        |
| <i>D. pinodes</i> CBS 525.77                    | CBS 525.77                   | GU237883  | GU238023 | GU237572 | KT389614 |
| <i>D. pomorum</i> CBS 285.76                    | CBS 285.76                   | FJ427053  | GU238025 | FJ427163 | KT389615 |
| <i>D. protuberans</i> CBS 381.96                | CBS 381.96                   | GU237853  | GU238029 | GU237574 | KT389620 |
| <i>D. rumicicola</i> CBS 683.79                 | CBS 683.79                   | KT389503  | KT389721 | KT389800 | KT389622 |
| <i>D. sancta</i> CBS 281.83                     | CBS 281.83                   | FJ427063  | GU238030 | FJ427170 | KT389623 |
| <i>D. segeticola</i> CGMCC 3.17489              | CGMCC 3.17489                | KP330443  | KP330455 | KP330399 | KP330414 |
| <i>D. suiyangensis</i> CGMCC 3.18352            | CGMCC 3.18352                | KY742089  | KY742243 | KY742330 | KY742168 |
| <i>Dothidotthia symphoricarpi</i> CBS<br>119687 | CBS 119687                   | /         | EU673273 | /        | /        |
| <i>Ectophoma multirostrata</i> CBS 274.60       | CBS 274.60                   | FJ427031  | GU238111 | FJ427141 | LT623265 |
| <i>E. pomi</i> CBS 267.92                       | CBS 267.92                   | GU237814  | GU238128 | GU237643 | LT623263 |
| <i>Epicoccum brasiliense</i> CBS 120105         | CBS 120105                   | GU237760  | GU238049 | GU237588 | KT389627 |
| <i>Epicoccum camelliae</i> CGMCC 3.18343        | CGMCC 3.18343                | GU237760  | GU238049 | GU237588 | KY742170 |
| <i>E. catenisporum</i> CBS 181.80               | CBS 181.80                   | FJ427069  | LT623213 | FJ427175 | LT623253 |
| <i>E. dendrobii</i> CGMCC 3.18359               | CGMCC 3.18359                | KY742093  | KY742247 | KY742335 | /        |
| <i>E. duchesneae</i> CGMCC 3.18345              | CGMCC 3.18345                | KY742095  | KY742249 | KY742337 | /        |
| <i>E. hordei</i>                                | CGMCC 3.18360                | KY742097  | KY742251 | KY742339 |          |
| <i>E. huancayense</i>                           | CBS 105.80                   | GU237732  | GU238084 | GU237615 | KT389630 |
| <i>E. italicum</i>                              | CGMCC 3.18361                | KY742099  | KY742253 | KY742341 | KY742172 |
| <i>E. keratinophilum</i>                        | CBS 142455                   | LT592930  | LN907414 | LT592999 | LT593068 |
| <i>E. latusicollum</i>                          | CGMCC 3.18346                | KY742101  | KY742255 | KY742343 | KY742174 |
| <i>E. layuense</i>                              | CGMCC 3.18362                | KY742107  | KY742261 | KY742349 | /        |
| <i>E. nigrum</i>                                | CBS 173.73                   | FJ426996  | GU237975 | FJ427107 | KT389632 |
| <i>E. ovisporum</i>                             | CBS 180.80                   | FJ427068  | LT623212 | FJ427174 | LT623252 |
| <i>E. plurivorum</i>                            | CBS 558.81                   | GU237888  | GU238132 | GU237647 | KT389634 |
| <i>E. pneumoniae</i>                            | UTHSC:DI16-257;<br>FMR 13747 | LT592927  | LN907400 | LT592996 | LT593065 |
| <i>E. poae</i>                                  | CGMCC 3.18363                | KY742113  | KY742267 | KY742355 | KY742182 |
| <i>E. proteae</i>                               | CBS 114179                   | JQ044433  | JQ044452 | LT623230 | LT623251 |
| <i>E. viticis</i>                               | CGMCC 3.18344                | KY742118  | KY742272 | KY742360 | KY742186 |
| <i>Heterophoma verbascicola</i>                 | CGMCC 3.18364                | KY742119  | KY742273 | KY742361 | KY742187 |
| <i>Leptosphaeria doliolum</i>                   | CBS 505.75                   | JF740205  | GQ387576 | JF740144 | KT389640 |
| <i>Libertasomyces myopor</i>                    | CBS 141302                   | NR_145200 | KX228332 | /        | /        |
| <i>L. platani</i>                               | CBS 142112                   | KY173416  | KY173507 | KY173604 | KY173585 |

|                                     |                |           |          |          |          |
|-------------------------------------|----------------|-----------|----------|----------|----------|
| <i>Libertasomyces quercus</i>       | CBS 134.97     | /         | DQ377883 | /        | /        |
| <i>Macroventuria anomochaeta</i>    | CBS 525.71     | GU237881  | GU237984 | GU237544 | GU456346 |
| <i>M. wentii</i>                    | CBS 526.71     | GU237884  | GU237986 | GU237546 | KT389642 |
| <i>Neosascochyta argentina</i>      | CBS 112524     | KT389524  | KT389742 | KT389822 |          |
| <i>N. cylindrispora</i>             | CBS 142456     | LT592963  | LN907502 | LT593032 | LT593102 |
| <i>N. desmazieri</i>                | CBS 297.69     | KT389508  | KT389726 | KT389807 | kt389644 |
| <i>N. europaea</i>                  | CBS 820.84     | KT389511  | KT389729 | KT389809 | KT389646 |
| <i>N. paspali</i>                   | CBS 560.81     | FJ427048  | GU238124 | FJ427158 | KP330426 |
| <i>N. soli</i>                      | CGMCC 3.18365  | KY742121  | KY742275 | KY742363 | /        |
| <i>N. tardicrescens</i>             | CBS 689.97     | KT389526  | KT389744 | KT389824 | KT389654 |
| <i>N. trititicola</i>               | CBS 544.74     | GU237887  | EU754134 | GU237488 | KT389652 |
| <i>Neocamarosporium goegapense</i>  | CBS 138008     | KJ869163  | KJ869220 | /        | /        |
| <i>Neocucurbitaria aquatica</i>     | CBS 297.74     | LT623221  | EU754177 | LT623238 | LT623278 |
| <i>N. cava</i>                      | CBS 257.68     | JF740260  | EU754199 | KT389844 | LT717681 |
| <i>N. hakeae</i>                    | CBS 142109     | KY173436  | KY173526 | KY173613 | KY173593 |
| <i>N. irregularis</i>               | CBS 142791     | LT592916  | LN907372 | LT592985 | LT593054 |
| <i>N. keratinophila</i>             | CBS 121759     | EU885415  | LT623215 | LT623236 | LT623275 |
| <i>N. quercina</i>                  | CBS 115095     | LT623220  | GQ387619 | LT623237 | LT623277 |
| <i>Neodidymelliopsis achlydis</i>   | CBS 256 77     | KT389531  | KT389749 | KT389829 | /        |
| <i>N. longicolla</i>                | CBS 382 96     | KT389532  | KT389750 | KT389830 |          |
| <i>N. polemonii</i>                 | CBS 109181     | GU237746  | GU238133 | KT389828 | KP330427 |
| <i>N. xanthina</i>                  | CBS 383.68     | GU237855  | GU238157 | KT389831 | KP330431 |
| <i>Neomicrosphaeriopsis italica</i> | MFLUCC 15-0485 | KU900318  | KU729854 | /        | KU674820 |
| <i>Neophaeosphaeria agaves</i>      | CBS 136429     | NR_137833 | KF777227 | /        | /        |
| <i>Neoplatysporoides aloicola</i>   | CBS 139901     | KR476719  | KR476754 | /        | /        |
| <i>Neopyrenochaeta acicola</i>      | CBS 812.95     | LT623218  | GQ387602 | LT623232 | LT623271 |
| <i>N. fragariae</i>                 | CBS 101634     | LT623217  | GQ387603 | LT623231 | LT623270 |
| <i>N. inflorescentiae</i>           | CBS 119222     | EU552153  | EU552153 | LT623233 | LT623272 |
| <i>N. telephoni</i>                 | CBS 139022     | KM516291  | KM516290 | LT717678 | LT717685 |
| <i>Neopyrenochaetopsis hominis</i>  | CBS 143033     | LT592923  | LN907381 | LT592992 | LT593061 |
| <i>Nothophoma anigozanthi</i>       | CBS 381.91     | GU237852  | GU238039 | GU237580 | KT389655 |
| <i>N. infossa</i>                   | CBS 123395     | FJ427025  | GU238089 | FJ427135 | KT389659 |
| <i>N. macrospora</i>                | CBS 140674     | LN880536  | LN880537 | LN880539 | LT593073 |
| <i>N. variabilis</i>                | CBS 142457     | LT592939  | LN907428 | LT593008 | LT593078 |
| <i>O. frigidarii</i>                | CBS 103.81     | EU040234  | EU040234 | /        | /        |
| <i>P. camelliae</i>                 | CGMCC 3.18106  | KX829034  | KX829042 | KX829058 | KX829050 |
| <i>P. litseae</i>                   | CGMCC 3.18109  | KX829029  | KX829037 | KX829053 | KX829045 |
| <i>P. oligotrophica</i>             | CGMCC 3.18111  | KX829031  | KX829039 | KX829055 | KX829047 |
| <i>P. selaginellae</i>              | CBS 122.93     | GU237762  | GU238142 | GU237656 | LT623255 |
| <i>Paraconiothyrium estuarinum</i>  | CBS 109850     | JX496016  | JX496129 | JX496355 | LT854937 |
| <i>Paracucurbitaria italica</i>     | CBS 234.92     | LT623219  | EU754176 | LT623235 | LT623274 |
| <i>Parapyrenochaeta acaciae</i>     | CBS 141291     | KX228265  | KX228316 | LT717679 | LT717686 |
| <i>P. protearum</i>                 | CBS 131315     | JQ044434  | JQ044453 | LT717677 | LT717683 |

|                                        |                             |           |          |          |          |
|----------------------------------------|-----------------------------|-----------|----------|----------|----------|
| <i>Phaeosphaeria oryzae</i>            | CBS 110110                  | KF251186  | KF251689 | KF252680 | /        |
| <i>Phomatodes aubrietiae</i>           | CBS 627.97                  | GU237895  | GU238045 | GU237585 | KT389665 |
| <i>Pleospora herbarum</i>              | CBS 191.86                  | NR_111243 | JX681120 | /        | KC584471 |
| <i>Pseudoascochyta novae-zelandiae</i> | CBS 141689                  | LT592892  | LT592893 | LT592894 | LT592895 |
| <i>P. pratensis</i>                    | CBS 141688                  | LT223130  | LT223131 | LT223132 | LT223133 |
| <i>Pseudopyrenochaeta lycopersici</i>  | CBS 306.65                  | NR_103581 | EU754205 | LT717674 | LT717680 |
| <i>P. terretris</i>                    | CBS 282.72                  | LT623228  | LT623216 | LT623246 | LT623287 |
| <i>Pyrenochaeta nobilis</i>            | CBS 407.76                  | EU930011  | EU754206 | KT389845 | LT623276 |
| <i>P. botulisporea</i>                 | CBS 142458                  | LT592946  | LN907441 | LT593015 | LT593085 |
| <i>P. confluens</i>                    | CBS 142459                  | LT592950  | LN907446 | LT593019 | LT593089 |
| <i>P. decipiens</i>                    | CBS 343.85                  | LT623223  | GQ387624 | LT623240 | LT623280 |
| <i>P. globosa</i>                      | CBS 143034                  | LT592934  | LN907418 | LT593003 | LT593072 |
| <i>P. indica</i>                       | CBS 124454                  | LT623224  | GQ387626 | LT623241 | LT623281 |
| <i>P. leptospora</i>                   | CBS 101635                  | JF740262  | GQ387627 | LT623242 | LT623282 |
| <i>P. microspora</i>                   | CBS 102876                  | LT623226  | GQ387631 | LT623244 | LT623284 |
| <i>P. paucisetosa</i>                  | CBS 142460                  | LT592897  | LN907336 | LT592966 | LT593035 |
| <i>P. poae</i>                         | CBS 136769                  | KJ869117  | KJ869175 | KJ869243 | LT623286 |
| <i>P. setosissima</i>                  | CBS 119739                  | LT623227  | GQ387632 | LT623245 | LT623285 |
| <i>P. tabarestanensis</i>              | CBS 139506                  | KF730241  | KF803343 | KX789523 | /        |
| <i>P. uberiformis</i>                  | CBS 142461                  | LT592935  | LN907420 | LT593004 | LT593074 |
| <i>Remotididymella anthropophila</i>   | CBS 142462                  | LT592936  | LN907421 | LT593005 | LT593075 |
| <i>R. destructiva</i>                  | CBS 378.73                  | GU237849  | GU238063 | GU237601 | LT623258 |
| <i>Similiphoma crystallifera</i>       | CBS 193.82                  | GU237797  | GU238060 | GU237598 | LT623267 |
| <i>Stagonosporopsis dorenboschii</i>   | CBS 426.90                  | GU237862  | GU238185 | GU237690 | KT389678 |
| <i>Staurosphaeria aloes</i>            | CBS 136437                  | NR_137821 | KF777198 | /        | /        |
| <i>S. aptrootii</i>                    | CBS 483.95                  | KY929149  | GU301806 | /        | /        |
| <i>S. lycicola</i>                     | CBS 142619                  | KY929150  | KY929180 | /        | /        |
| <i>Vacuiphoma bulgarica</i>            | CBS 357.84                  | GU237837  | GU238050 | GU237589 | LT623256 |
| <i>V. oculihominis</i>                 | UTHSC:DI16-308;<br>FMR13801 | LT592954  | LN907451 | LT593023 | LT593093 |
| <i>X. asphodeli</i>                    | CBS 375.62                  | KT389549  | KT389765 | KT389853 | KT389689 |
| <i>X. saxea</i>                        | CBS 419.92                  | GU237860  | GU238141 | GU237655 | KP330429 |
| <i>Xenopyrenochaetopsis pratorum</i>   | CBS 445.81                  | JF740263  | GU238136 | KT389846 | KT389671 |

CBS: Westerdijk Fungal Biodiversity Institute (WIFB), Utrecht, The Netherlands. NRRL (Northern Regional Research Laboratory): Agricultural Research Service Culture Collection Database, Peoria, USA. CMW: The working collection of FABI (Forestry and Agricultural Biotechnology Institute), University of Pretoria, South Africa. BBA: Julius Kühn-Institute, Institute for Epidemiology and Pathogen Diagnostics, Berlin and Braunschweig, Germany. CPC: Collection of P.W. Crous.

Table S2. GenBank accession numbers used to identify *Alternaria* strains used in the phylogenetic analyses.

| Species                    | Strain number | GenBank accession number |          |             |
|----------------------------|---------------|--------------------------|----------|-------------|
|                            |               | ITS                      | LSU      | <i>rpb2</i> |
| <i>Alternaria abundans</i> | CBS 534.83    | JN383485                 | KC584323 | KC584448    |
| <i>A. A.e</i>              | CBS 126989    | AF229485                 | KC584346 | KC584470    |

|                                 |             |          |          |          |
|---------------------------------|-------------|----------|----------|----------|
| <i>A. alternata</i>             | CBS 916.96  | AF347031 | DQ678082 | KC584375 |
| <i>A. anigozanthi</i>           | CBS 121920  | KC584180 | KC584252 | KC584376 |
| <i>A. arborescens</i>           | CBS 102605  | AF347033 | KC584253 | KC584377 |
| <i>A. argyranthemii</i>         | CBS 116530  | KC584181 | KC584254 | KC584378 |
| <i>A. armoraciae</i>            | CBS 118702  | KC584182 | KC584255 | KC584379 |
| <i>A. aspera</i>                | CBS 115269  | KC584242 | KC584349 | KC584474 |
| <i>A. atra</i>                  | CBS 195.67  | AF229486 | KC584350 | KC584475 |
| <i>A. avenicola</i>             | CBS 121459  | KC584183 | KC584256 | KC584380 |
| <i>A. axiaeriisporifera</i>     | CBS 118715  | KC584184 | KC584257 | KC584381 |
| <i>A. bornmuelleri</i>          | DAOM 231361 | FJ357317 | KC584366 | KC584491 |
| <i>A. botryospora</i>           | CBS 478.90  | AY278844 | KC584336 | KC584461 |
| <i>A. botrytis</i>              | CBS 197.67  | KC584243 | KC584351 | KC584476 |
| <i>A. brassicae</i>             | CBS 116528  | KC584185 | KC584258 | KC584382 |
| <i>A. brassicae- pekinensis</i> | CBS 121493  | KC584244 | KC584353 | KC584478 |
| <i>A. brassicicola</i>          | CBS 118699  | JX499031 | KC584259 | KC584383 |
| <i>A. breviramosa</i>           | CBS 121331  | FJ839608 | KC584318 | KC584442 |
| <i>A. caespitosa</i>            | CBS 177.80  | KC584250 | KC584367 | KC584492 |
| <i>A. calycipyricola</i>        | CBS 121545  | KC584186 | KC584260 | KC584384 |
| <i>A. cantlous</i>              | CBS 123007  | KC584245 | KC584354 | KC584479 |
| <i>A. caricis</i>               | CBS 480.90  | AY278839 | KC584342 | KC584467 |
| <i>A. carotiincultae</i>        | CBS 109381  | KC584188 | KC584262 | KC584386 |
| <i>A. cetera</i>                | CBS 121340  | JN383482 | KC584317 | KC584441 |
| <i>A. chartarum</i>             | CBS 200.67  | AF229488 | KC584356 | KC584481 |
| <i>A. cheiranthi</i>            | CBS 109384  | AF229457 | KC584263 | KC584387 |
| <i>A. chlamydospora</i>         | CBS 491.72  | KC584189 | KC584264 | KC584388 |
| <i>A. chlamydosporigena</i>     | CBS 341.71  | KC584231 | KC584326 | KC584451 |
| <i>A. cinerariae</i>            | CBS 116495  | KC584190 | KC584265 | KC584389 |
| <i>A. concatenata</i>           | CBS 120006  | KC584246 | KC584355 | KC584480 |
| <i>A. conjuncta</i>             | CBS 196.86  | FJ266475 | KC584266 | KC584390 |
| <i>A. consortialis</i>          | CBS 104.31  | KC584247 | KC584357 | KC584482 |
| <i>A. cucurbitae</i>            | CBS 483.81  | FJ266483 | KC584358 | KC584483 |
| <i>A. cumini</i>                | CBS 121329  | KC584191 | KC584267 | KC584391 |
| <i>A. dauci</i>                 | CBS 117097  | KC584192 | KC584268 | KC584392 |
| <i>A. daucifolii</i>            | CBS 118812  | KC584193 | KC584269 | KC584393 |
| <i>A. dennisii</i>              | CBS 476.90  | JN383488 | KC584329 | KC584454 |
| <i>A. dianthicola</i>           | CBS 116491  | KC584194 | KC584270 | KC584394 |
| <i>A. elegans</i>               | CBS 109159  | KC584195 | KC584271 | KC584395 |
| <i>A. ellipsoidea</i>           | CBS 119674  | KC584196 | KC584272 | KC584396 |
| <i>A. embellisia</i>            | CBS 339.71  | KC584230 | KC584324 | KC584449 |
| <i>A. eryngii</i>               | CBS 121339  | JQ693661 | KC584273 | KC584397 |
| <i>A. ethzedia</i>              | CBS 197.86  | AF392987 | KC584274 | KC584398 |
| <i>A. eureka</i>                | CBS 193.86  | JN383490 | KC584331 | KC584456 |
| <i>A. gaisen</i>                | CBS 632.93  | KC584197 | KC584275 | KC584399 |

|                              |            |          |          |          |
|------------------------------|------------|----------|----------|----------|
| <i>A. geniostomatis</i>      | CBS 118701 | KC584198 | KC584276 | KC584400 |
| <i>A. gypsophilae</i>        | CBS 107.41 | KC584199 | KC584277 | KC584401 |
| <i>A. helianthiinficiens</i> | CBS 117370 | KC584200 | KC584278 | KC584402 |
| <i>A. helianthiinficiens</i> | CBS 208.86 | JX101649 | KC584279 | KC584403 |
| <i>A. heterospora</i>        | CBS 123376 | KC584248 | KC584363 | KC584488 |
| <i>A. hyacinthi</i>          | CBS 416.71 | KC584233 | KC584332 | KC584457 |
| <i>A. indefessa</i>          | CBS 536.83 | KC584234 | KC584333 | KC584458 |
| <i>A. infectoria</i>         | CBS 210.86 | DQ323697 | KC584280 | KC584404 |
| <i>A. japonica</i>           | CBS 118390 | KC584201 | KC584281 | KC584405 |
| <i>A. juxtiseptata</i>       | CBS 119673 | KC584202 | KC584282 | KC584406 |
| <i>A. leptinellae</i>        | CBS 477.90 | KC584235 | KC584334 | KC584459 |
| <i>A. leucanthemi</i>        | CBS 422.65 | KC584241 | KC584348 | KC584473 |
| <i>A. leucanthemi</i>        | CBS 421.65 | KC584240 | KC584347 | KC584472 |
| <i>A. limaciformis</i>       | CBS 481.81 | KC584203 | KC584283 | KC584407 |
| <i>A. limoniasperae</i>      | CBS 102595 | FJ266476 | KC584284 | KC584408 |
| <i>A. lolii</i>              | CBS 115266 | JN383492 | KC584335 | KC584460 |
| <i>A. longipes</i>           | CBS 540.94 | AY278835 | KC584285 | KC584409 |
| <i>A. macrospora</i>         | CBS 117228 | KC584204 | KC584286 | KC584410 |
| <i>A. mimicula</i>           | CBS 118696 | FJ266477 | KC584287 | KC584411 |
| <i>A. molesta</i>            | CBS 548.81 | KC584205 | KC584288 | KC584412 |
| <i>A. mouchaccae</i>         | CBS 119671 | KC584206 | KC584289 | KC584413 |
| <i>A. multiformis</i>        | CBS 102060 | FJ266486 | KC584359 | KC584484 |
| <i>A. nepalensis</i>         | CBS 118700 | KC584207 | KC584290 | KC584414 |
| <i>A. nobilis</i>            | CBS 116490 | KC584208 | KC584291 | KC584415 |
| <i>A. obclavata</i>          | CBS 124120 | KC584225 | FJ839651 | KC584443 |
| <i>A. oregonensis</i>        | CBS 542.94 | FJ266478 | KC584292 | KC584416 |
| <i>A. oudemansii</i>         | CBS 114.07 | FJ266488 | KC584361 | KC584486 |
| <i>A. panax</i>              | CBS 482.81 | KC584209 | KC584293 | KC584417 |
| <i>A. papavericola</i>       | CBS 116606 | FJ357310 | KC584321 | KC584446 |
| <i>A. penicillata</i>        | CBS 116608 | FJ357311 | KC584316 | KC584440 |
| <i>A. penicillata</i>        | CBS 116607 | KC584229 | KC584322 | KC584447 |
| <i>A. perpunctulata</i>      | CBS 115267 | KC584210 | KC584294 | KC584418 |
| <i>A. petroselini</i>        | CBS 112.41 | KC584211 | KC584295 | KC584419 |
| <i>A. photistica</i>         | CBS 212.86 | KC584212 | KC584296 | KC584420 |
| <i>A. phragmospora</i>       | CBS 274.70 | JN383493 | KC584337 | KC584462 |
| <i>A. planifunda</i>         | CBS 537.83 | FJ357315 | KC584338 | KC584463 |
| <i>A. porri</i>              | CBS 116698 | DQ323700 | KC584297 | KC584421 |
| <i>A. proteae</i>            | CBS 475.90 | AY278842 | KC584339 | KC584464 |
| <i>A. pseudorostrata</i>     | CBS 119411 | JN383483 | KC584298 | KC584422 |
| <i>A. radicina</i>           | CBS 245.67 | KC584213 | KC584299 | KC584423 |
| <i>A. saponariae</i>         | CBS 116492 | KC584215 | KC584301 | KC584425 |
| <i>A. scirpicola</i>         | CBS 481.90 | KC584237 | KC584344 | KC584469 |
| <i>A. selini</i>             | CBS 109382 | AF229455 | KC584302 | KC584426 |

|                                    |            |          |          |          |
|------------------------------------|------------|----------|----------|----------|
| <i>A. septorioides</i>             | CBS 106.41 | KC584216 | KC584303 | KC584427 |
| <i>A. simsini</i>                  | CBS 115265 | JF780937 | KC584304 | KC584428 |
| <i>A. slovacae</i>                 | CBS 567.66 | KC584226 | KC584319 | KC584444 |
| <i>A. smyrnii</i>                  | CBS 109380 | AF229456 | KC584305 | KC584429 |
| <i>A. solani</i>                   | CBS 116651 | KC584217 | KC584306 | KC584430 |
| <i>A. soliaridae</i>               | CBS 118387 | KC584218 | KC584307 | KC584431 |
| <i>A. solidaccana</i>              | CBS 118698 | KC584219 | KC584308 | KC584432 |
| <i>A. sonchi</i>                   | CBS 119675 | KC584220 | KC584309 | KC584433 |
| <i>A. subcucurbitae</i>            | CBS 121491 | KC584249 | KC584364 | KC584489 |
| <i>A. taetica</i>                  | CBS 479.81 | KC584221 | KC584310 | KC584434 |
| <i>A. tellustris</i>               | CBS 538.83 | FJ357316 | KC584340 | KC584465 |
| <i>A. tenuissima</i>               | CBS 918.96 | AF347032 | KC584311 | KC584435 |
| <i>A. terricola</i>                | CBS 202.67 | FJ266490 | KC584365 | KC584490 |
| <i>A. thalictrigena</i>            | CBS 121712 | EU040211 | KC584312 | KC584436 |
| <i>A. triglochinnicola</i>         | CBS 119676 | KC584222 | KC584313 | KC584437 |
| <i>A. tumida</i>                   | CBS 539.83 | FJ266481 | KC584341 | KC584466 |
| <i>A. vaccariae</i>                | CBS 116533 | KC584223 | KC584314 | KC584438 |
| <i>A. vaccariicola</i>             | CBS 118714 | KC584224 | KC584315 | KC584439 |
| <i>A. ster helianthi</i>           | CBS 119672 | /        | KC584368 | KC584493 |
| <i>Cicatricea salina</i>           | CBS 302.84 | JN383486 | KC584325 | KC584450 |
| <i>Paradendryphiella arenariae</i> | CBS 181.58 | /        | KC793338 | DQ470924 |
| <i>Peyronellaea zae- maydis</i>    | CBS 588.69 | /        | EU754192 | GU371782 |
| <i>Pleospora tarda</i>             | CBS 714.68 | KC584238 | KC584345 | AF107804 |
| <i>Pyrenochaeta nobilis</i>        | CBS 407.76 | /        | DQ678096 | DQ677991 |
| <i>Stemphylium herbarum</i>        | CBS 191.86 | KC584239 | GU238160 | KC584471 |

CBS: Westerdijk Fungal Biodiversity Institute (WIFB), Utrecht, The Netherlands. NRRL (Northern Regional Research Laboratory): Agricultural Research Service Culture Collection Database, Peoria, USA. CMW: The working collection of FABI (Forestry and Agricultural Biotechnology Institute), University of Pretoria, South Africa. BBA: Julius Kühn-Institute, Institute for Epidemiology and Pathogen Diagnostics, Berlin and Braunschweig, Germany. CPC: Collection of P.W. Crous.

Table S3. GenBank accession numbers used to identify *Stagonosporopsis* strains used in the phylogenetic analyses.

| Species                         | Strain number  | GenBank accession number |          |             |             |
|---------------------------------|----------------|--------------------------|----------|-------------|-------------|
|                                 |                | ITS                      | LSU      | <i>tub2</i> | <i>rpb2</i> |
| <i>Allophoma piperis</i>        | CBS 268.93     | GU237816                 | GU238129 | GU237644    | KT389554    |
| <i>S. actaeae</i>               | CBS 105.96     | GU237733                 | GU238165 | GU237670    | MT018018    |
| <i>Stagonosporopsis actaeae</i> | CBS 106.96     | GU237734                 | GU238166 | GU237671    | KT389672    |
| <i>S. ailanthicola</i>          | MFLUCC 16-1439 | KY100872                 | KY100874 | KY100878    | KY100876    |
| <i>S. ajacis</i>                | CBS 176.93     | GU237790                 | GU238167 | GU237672    | MT018035    |
| <i>S. ajacis</i>                | CBS 177.93     | GU237791                 | GU238168 | GU237673    | KT389673    |
| <i>S. andigena</i>              | CBS 101.80     | GU237714                 | GU238169 | GU237674    | /           |
| <i>S. artemisiicola</i>         | CBS 102636     | GU237728                 | GU238171 | GU237676    | KT389674    |
| <i>S. astragali</i>             | CBS 178.25     | GU237792                 | GU238172 | GU237677    | MT018030    |

|                             |                |           |          |          |          |
|-----------------------------|----------------|-----------|----------|----------|----------|
| <i>S. bomiensis</i>         | LC 8167        | KY742123  | KY742277 | KY742365 | KY742189 |
| <i>S. bomiensis</i>         | LC 8168        | KY742124  | KY742278 | KY742366 | KY742190 |
| <i>S. caricae</i>           | CBS 119735     | MN973042  | MN973431 | MN984054 | MN983680 |
| <i>S. centaureae</i>        | MFLUCC 16-0787 | KX611240  | KX611238 | /        | /        |
| <i>S. chrysanthemi</i>      | CBS 137.96     | GU237783  | GU238191 | GU237696 | MT018011 |
| <i>S. chrysanthemi</i>      | CBS 500.63     | GU237871  | GU238190 | GU237695 | MT018012 |
| <i>S. citrulli</i>          | FLAS-F-58996   | KJ855546  | /        | KJ855602 | /        |
| <i>S. crystalliniformis</i> | CBS 713.85     | GU237903  | GU238178 | GU237683 | KT389675 |
| <i>S. crystalliniformis</i> | CBS 771.85     | GU237906  | GU238179 | GU237684 | /        |
| <i>S. cucumeris</i>         | CBS 386.65     | MN973455  | MN943657 | MT005554 | MT018021 |
| <i>S. cucurbitacearum</i>   | CBS 109171     | GU237922  | GU238180 | GU237685 | MN983682 |
| <i>S. cucurbitacearum</i>   | CBS 214.65     | MN973454  | MN943656 | MT005553 | MT018020 |
| <i>S. cucurbitacearum</i>   | CBS 233.52     | MN973456  | MN943658 | MT005555 | MT018024 |
| <i>S. dennisii</i>          | CBS 135.96     | GU237782  | GU238183 | GU237688 | MT018019 |
| <i>S. dennisii</i>          | CBS 631.68     | GU237899  | GU238182 | GU237687 | KT389677 |
| <i>S. dorenboschii</i>      | CBS 320.90     | GU237830  | GU238184 | GU237689 | MT018039 |
| <i>S. dorenboschii</i>      | CBS 426.90     | GU237862  | GU238185 | GU237690 | KT389678 |
| <i>S. helianthi</i>         | CBS 155.90     | MN973457  | MN943659 | MT005556 | MT018025 |
| <i>S. helianthi</i>         | CBS 200.87     | KT389545  | KT389761 | KT389848 | KT389683 |
| <i>S. heliopsidis</i>       | CBS 109182     | GU237747  | GU238186 | GU237691 | KT389679 |
| <i>S. hortensis</i>         | CBS 104.42     | GU237730  | GU238198 | GU237703 | KT389680 |
| <i>S. hortensis</i>         | CBS 572.85     | GU237893  | GU238199 | GU237704 | KT389681 |
| <i>S. inoxydabilis</i>      | CBS 425.90     | GU237861  | GU238188 | GU237693 | KT389682 |
| <i>S. loticola</i>          | CBS 562.81     | GU237890  | GU238192 | GU237697 | KT389684 |
| <i>S. loticola</i>          | CBS 563.81     | MN973465  | MN943667 | MT005564 | MT018040 |
| <i>S. lupini</i>            | CBS 101494     | GU237724  | GU238194 | GU237699 | KT389685 |
| <i>S. nemophilae</i>        | CBS 715.85     | MN973460  | MN943662 | MT005559 | MT018031 |
| <i>S. oculo-hominis</i>     | CBS 634.92     | GU237901  | GU238196 | GU237701 | KT389686 |
| <i>S. papillata</i>         | CGMCC 3.18367  | KY742125  | KY742279 | KY742367 | KY742191 |
| <i>S. pini</i>              | MFLUCC 18-1549 | MK347800  | MK348019 | MK412886 | MK434860 |
| <i>S. rhizophilae</i>       | XDPOP-RS-9     | MN422101  | MN422103 | MN422099 | MN422105 |
| <i>S. rudbeckiae</i>        | CBS 109180     | GU237745  | GU238197 | GU237702 | MT018015 |
| <i>S. sambucella</i>        | CBS 130003     | MN973459  | MN943661 | MT005558 | MT018029 |
| <i>S. stuijvenbergii</i>    | CBS 144953     | MN823449  | MN823300 | MN824623 | MN824475 |
| <i>S. tanacetii</i>         | CBS 131484     | NR_111724 | KP161044 | JQ897496 | MT018013 |
| <i>S. tanacetii</i>         | CBS 131485     | MN973452  | MN943654 | MT005551 | MT018014 |
| <i>S. trachelii</i>         | CBS 379.91     | GU237850  | GU238173 | GU237678 | KT389687 |
| <i>S. trachelii</i>         | CBS 384.68     | GU237856  | GU238174 | GU237679 | MT018016 |
| <i>S. valerianellae</i>     | CBS 273.92     | GU237819  | GU238200 | GU237705 | MT018033 |
| <i>S. valerianellae</i>     | CBS 329.67     | GU237832  | GU238201 | GU237706 | MT018034 |
| <i>S. weymaniae</i>         | CBS 144959     | MN823453  | MN823304 | MN824627 | MN824479 |



CBS: Westerdijk Fungal Biodiversity Institute (WIFB), Utrecht, The Netherlands. NRRL (Northern Regional Research Laboratory): Agricultural Research Service Culture Collection Database, Peoria, USA. CMW: The working collection of FABI (Forestry and Agricultural Biotechnology Institute), University of Pretoria, South Africa. BBA: Julius Kühn-Institute, Institute for Epidemiology and Pathogen Diagnostics, Berlin and Braunschweig, Germany. CPC: Collection of P.W. Crous.
