# Supplementary figures and images for: Characterization and Control of Dendrobium officinale Bud Blight Disease
Source: MDPI journal article supplement (doi:10.3390/pathogens12040621), 2023-04-20

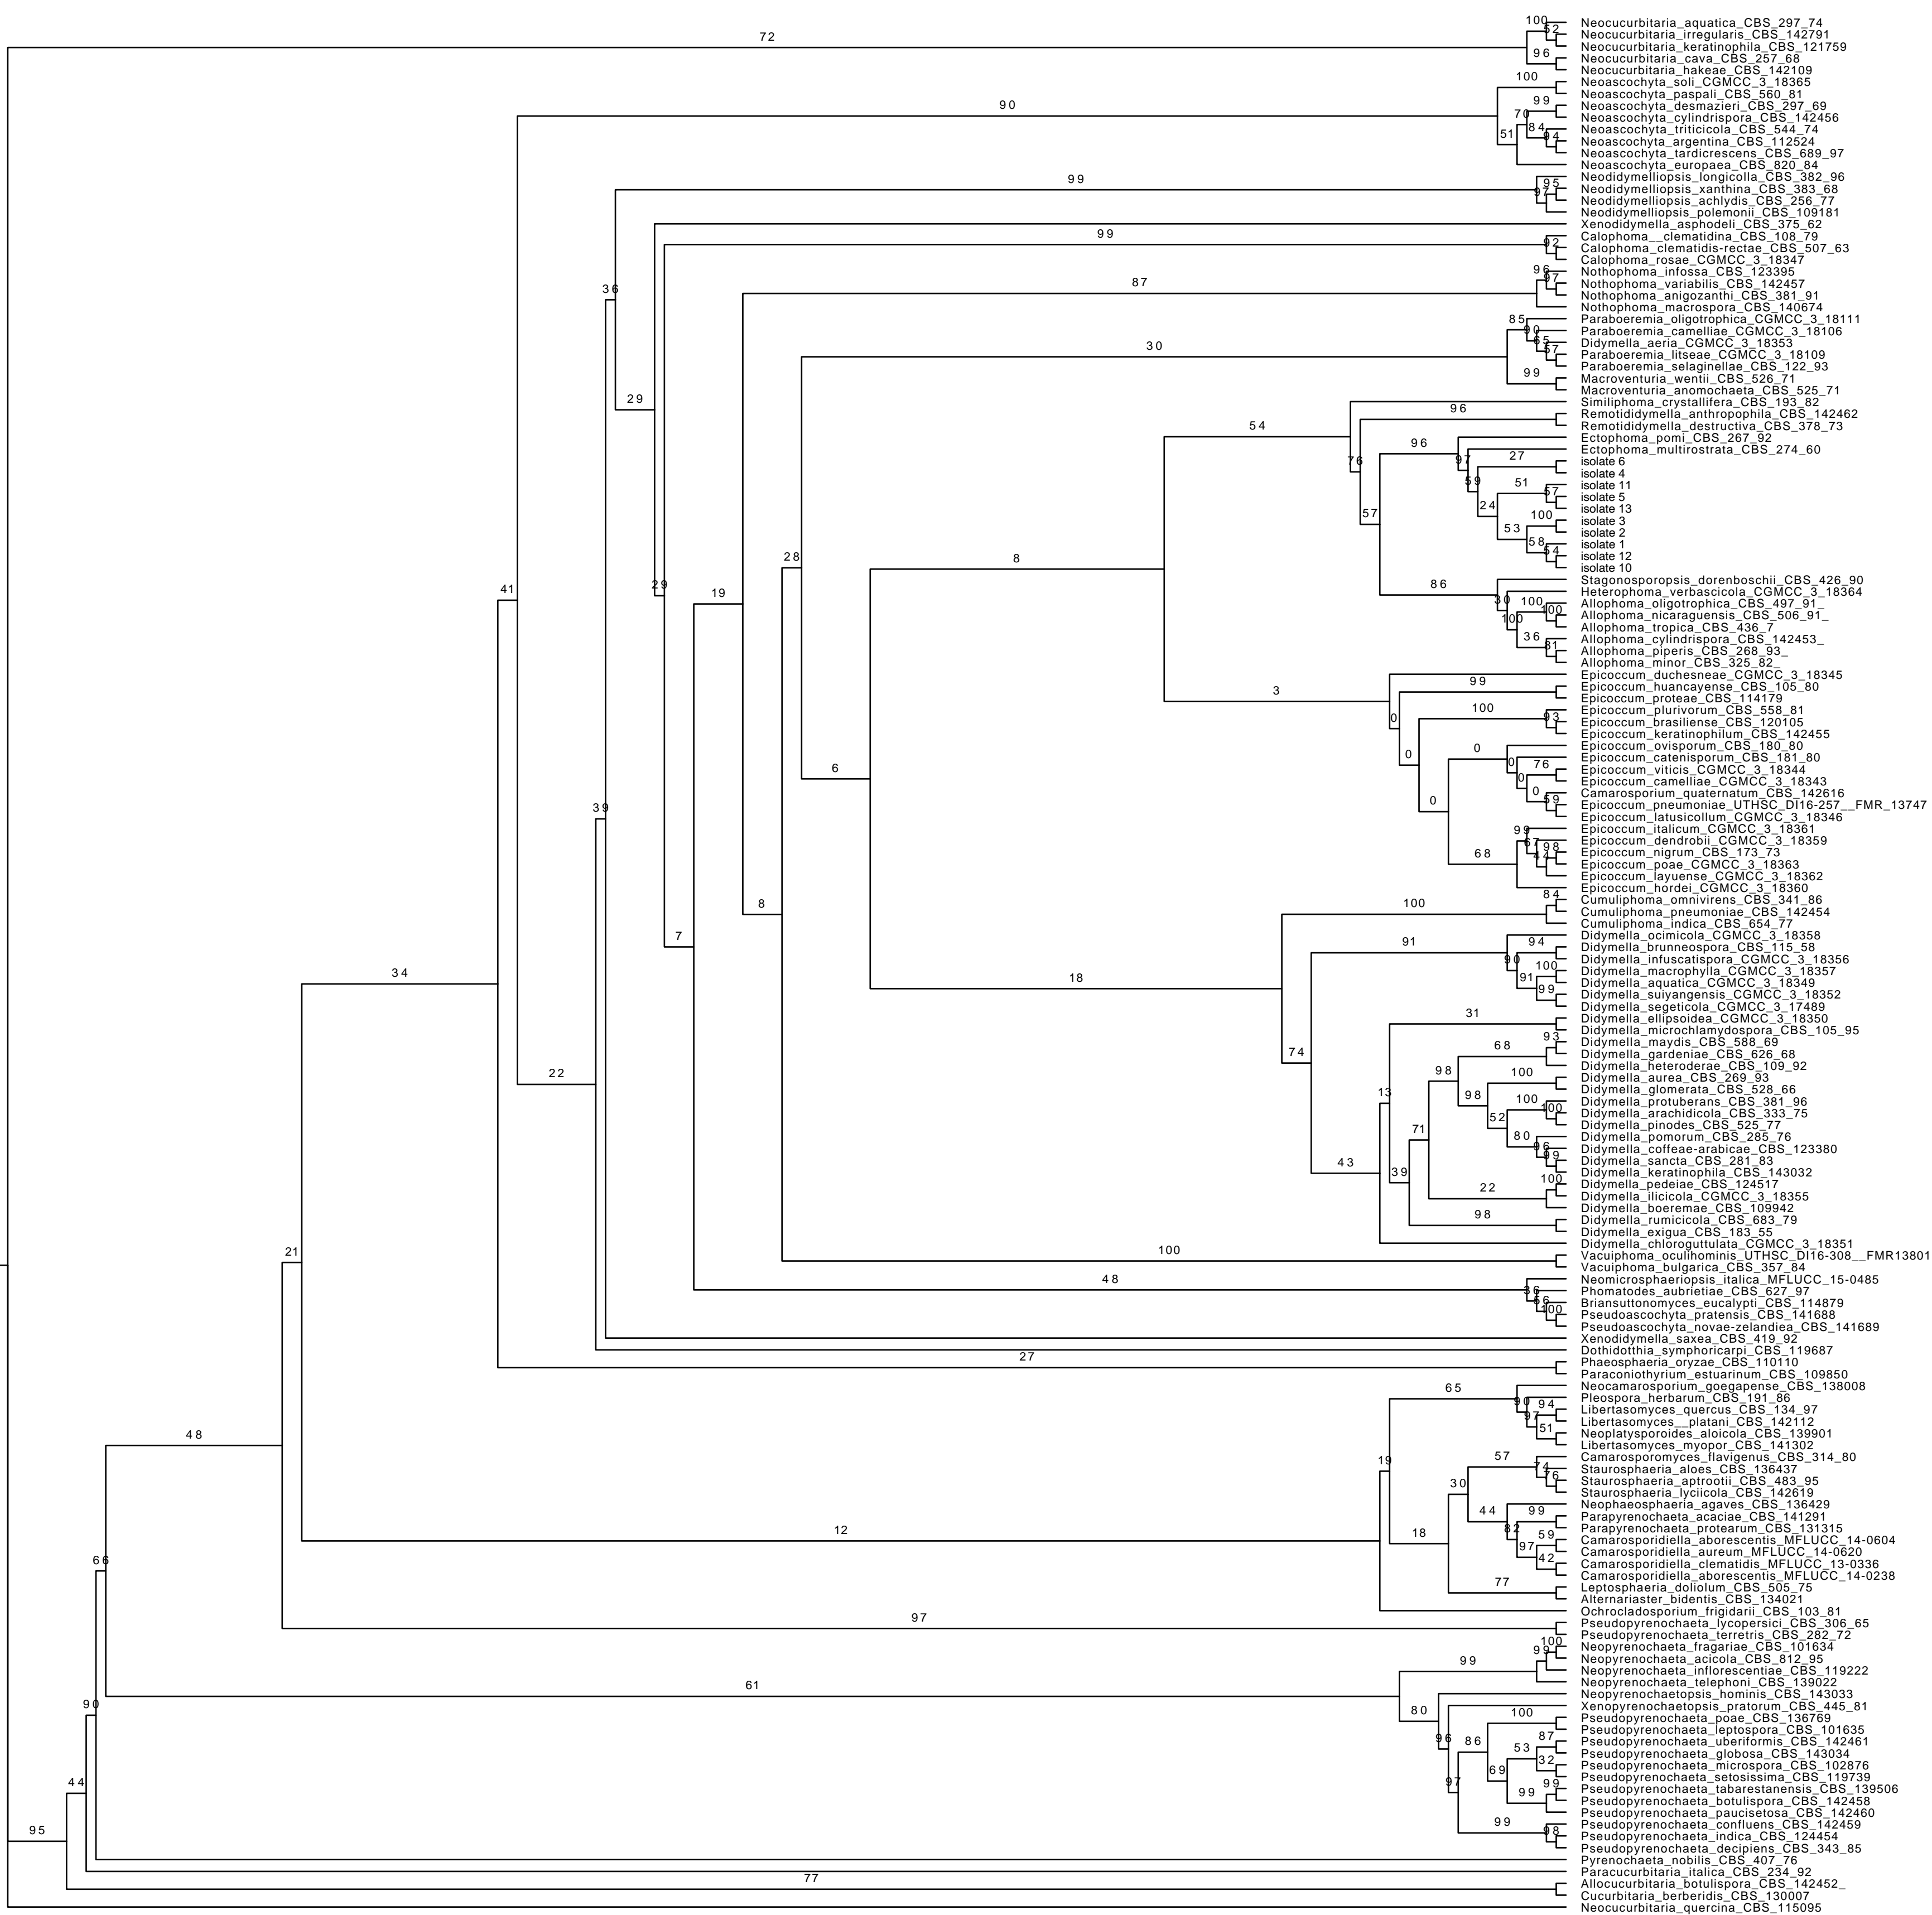

Supplement: s1 [file s1]

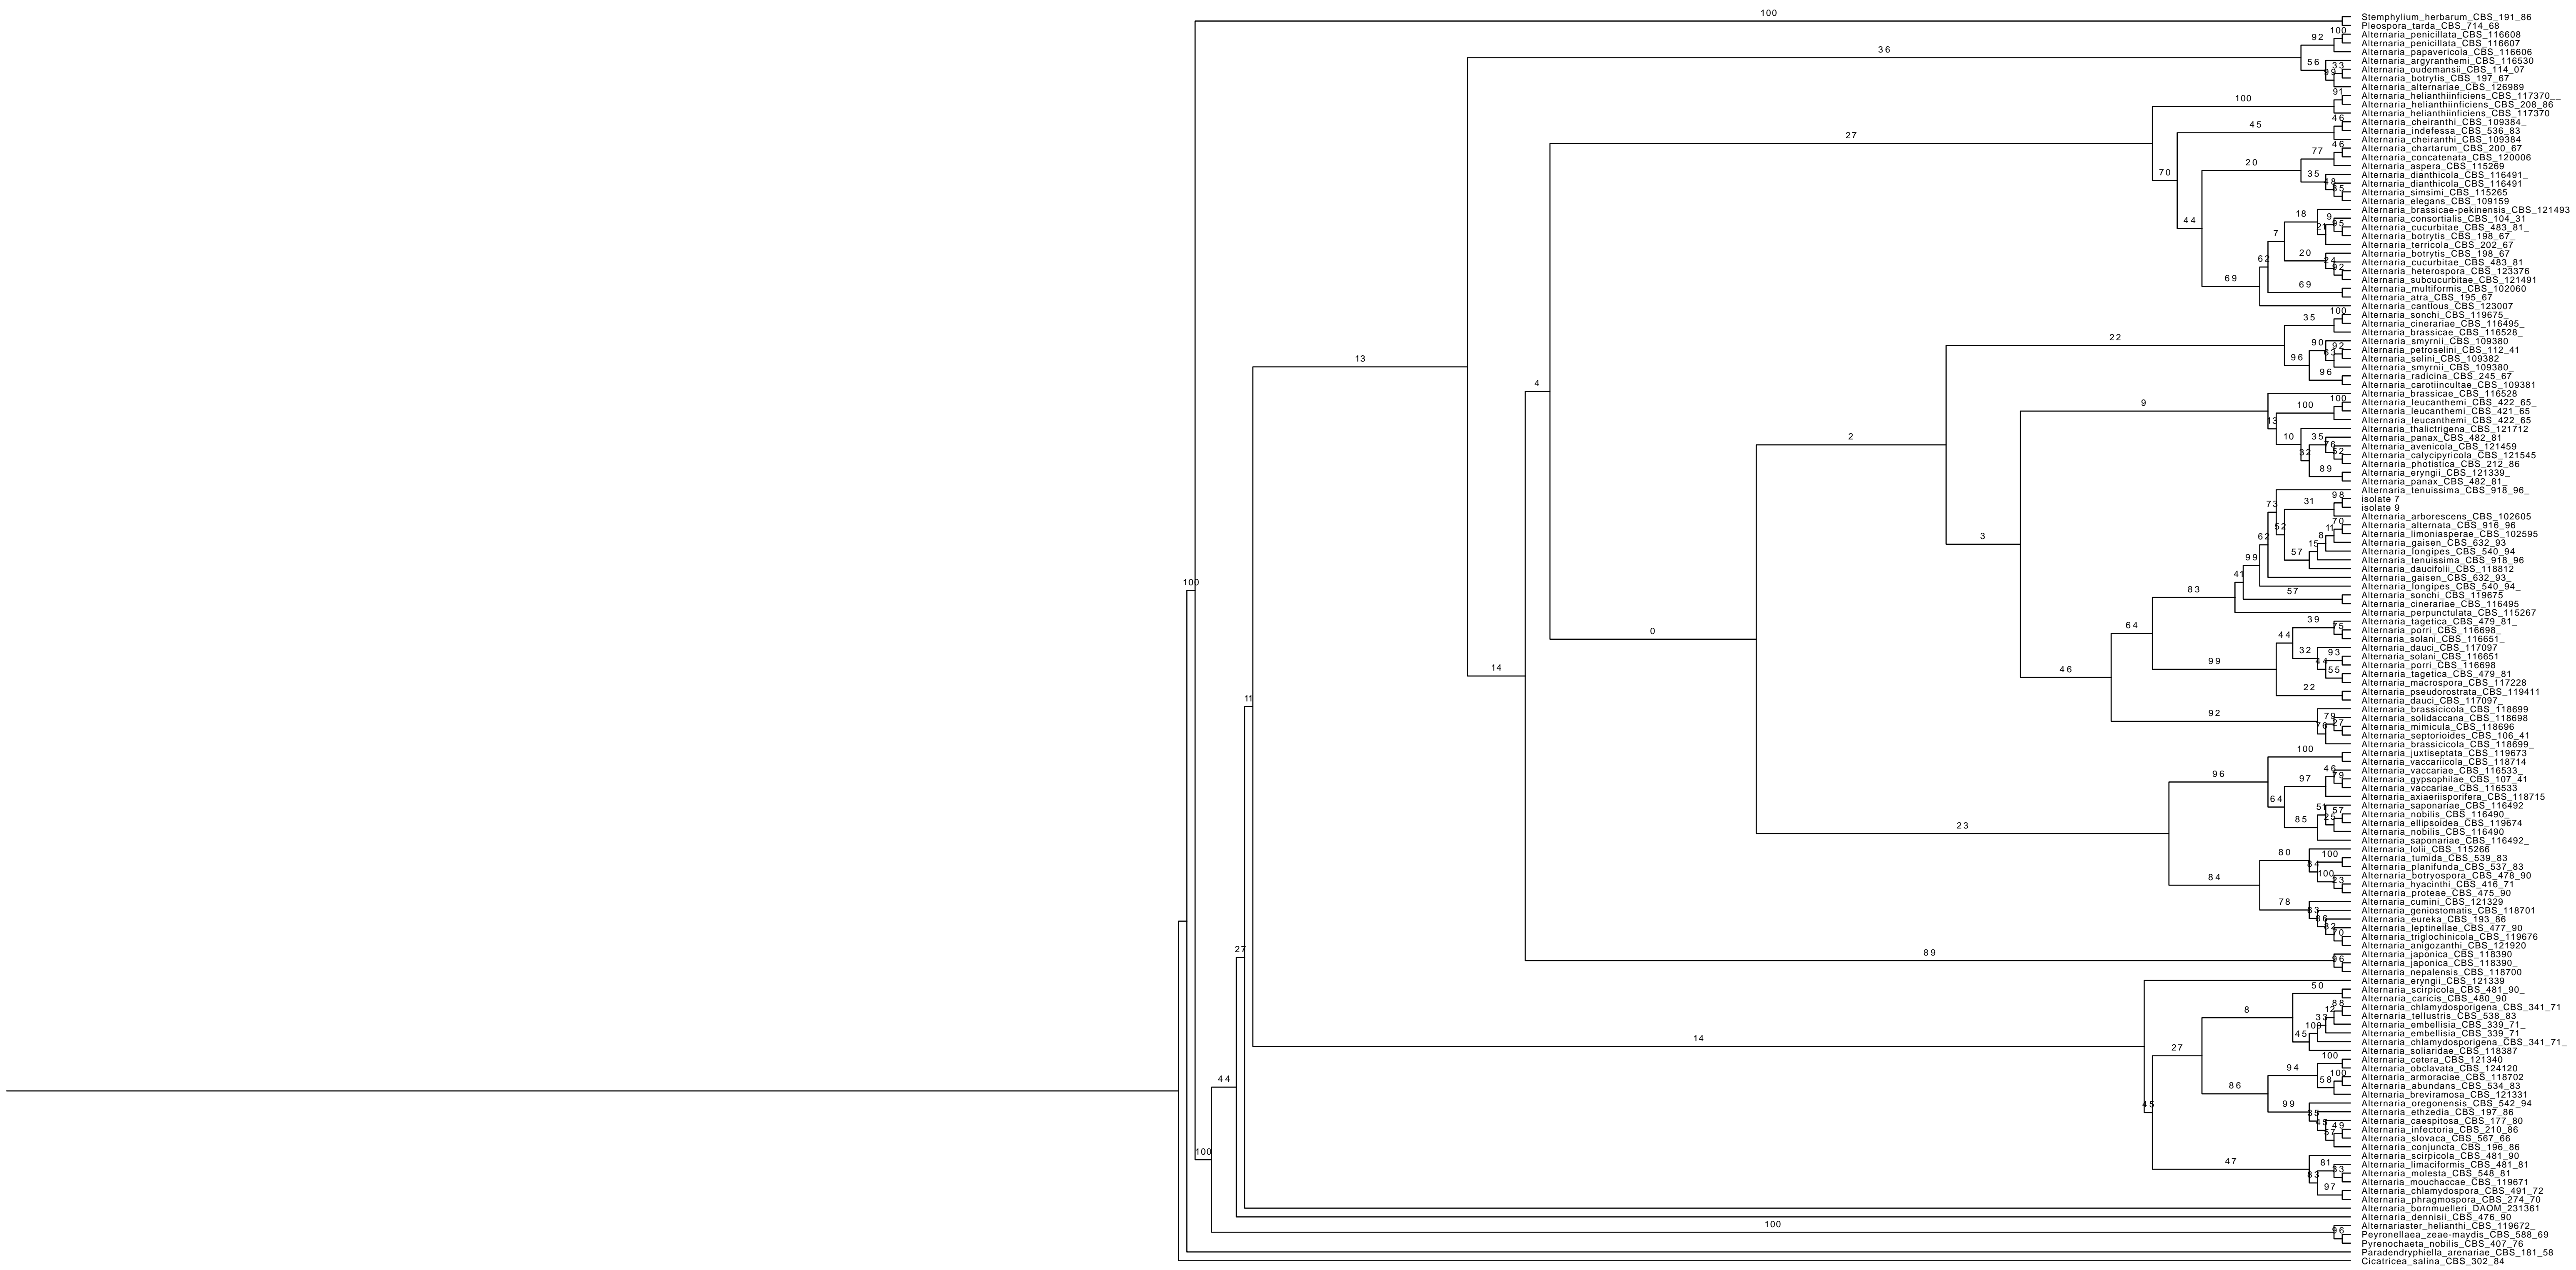

Supplement: s1 [file s1]

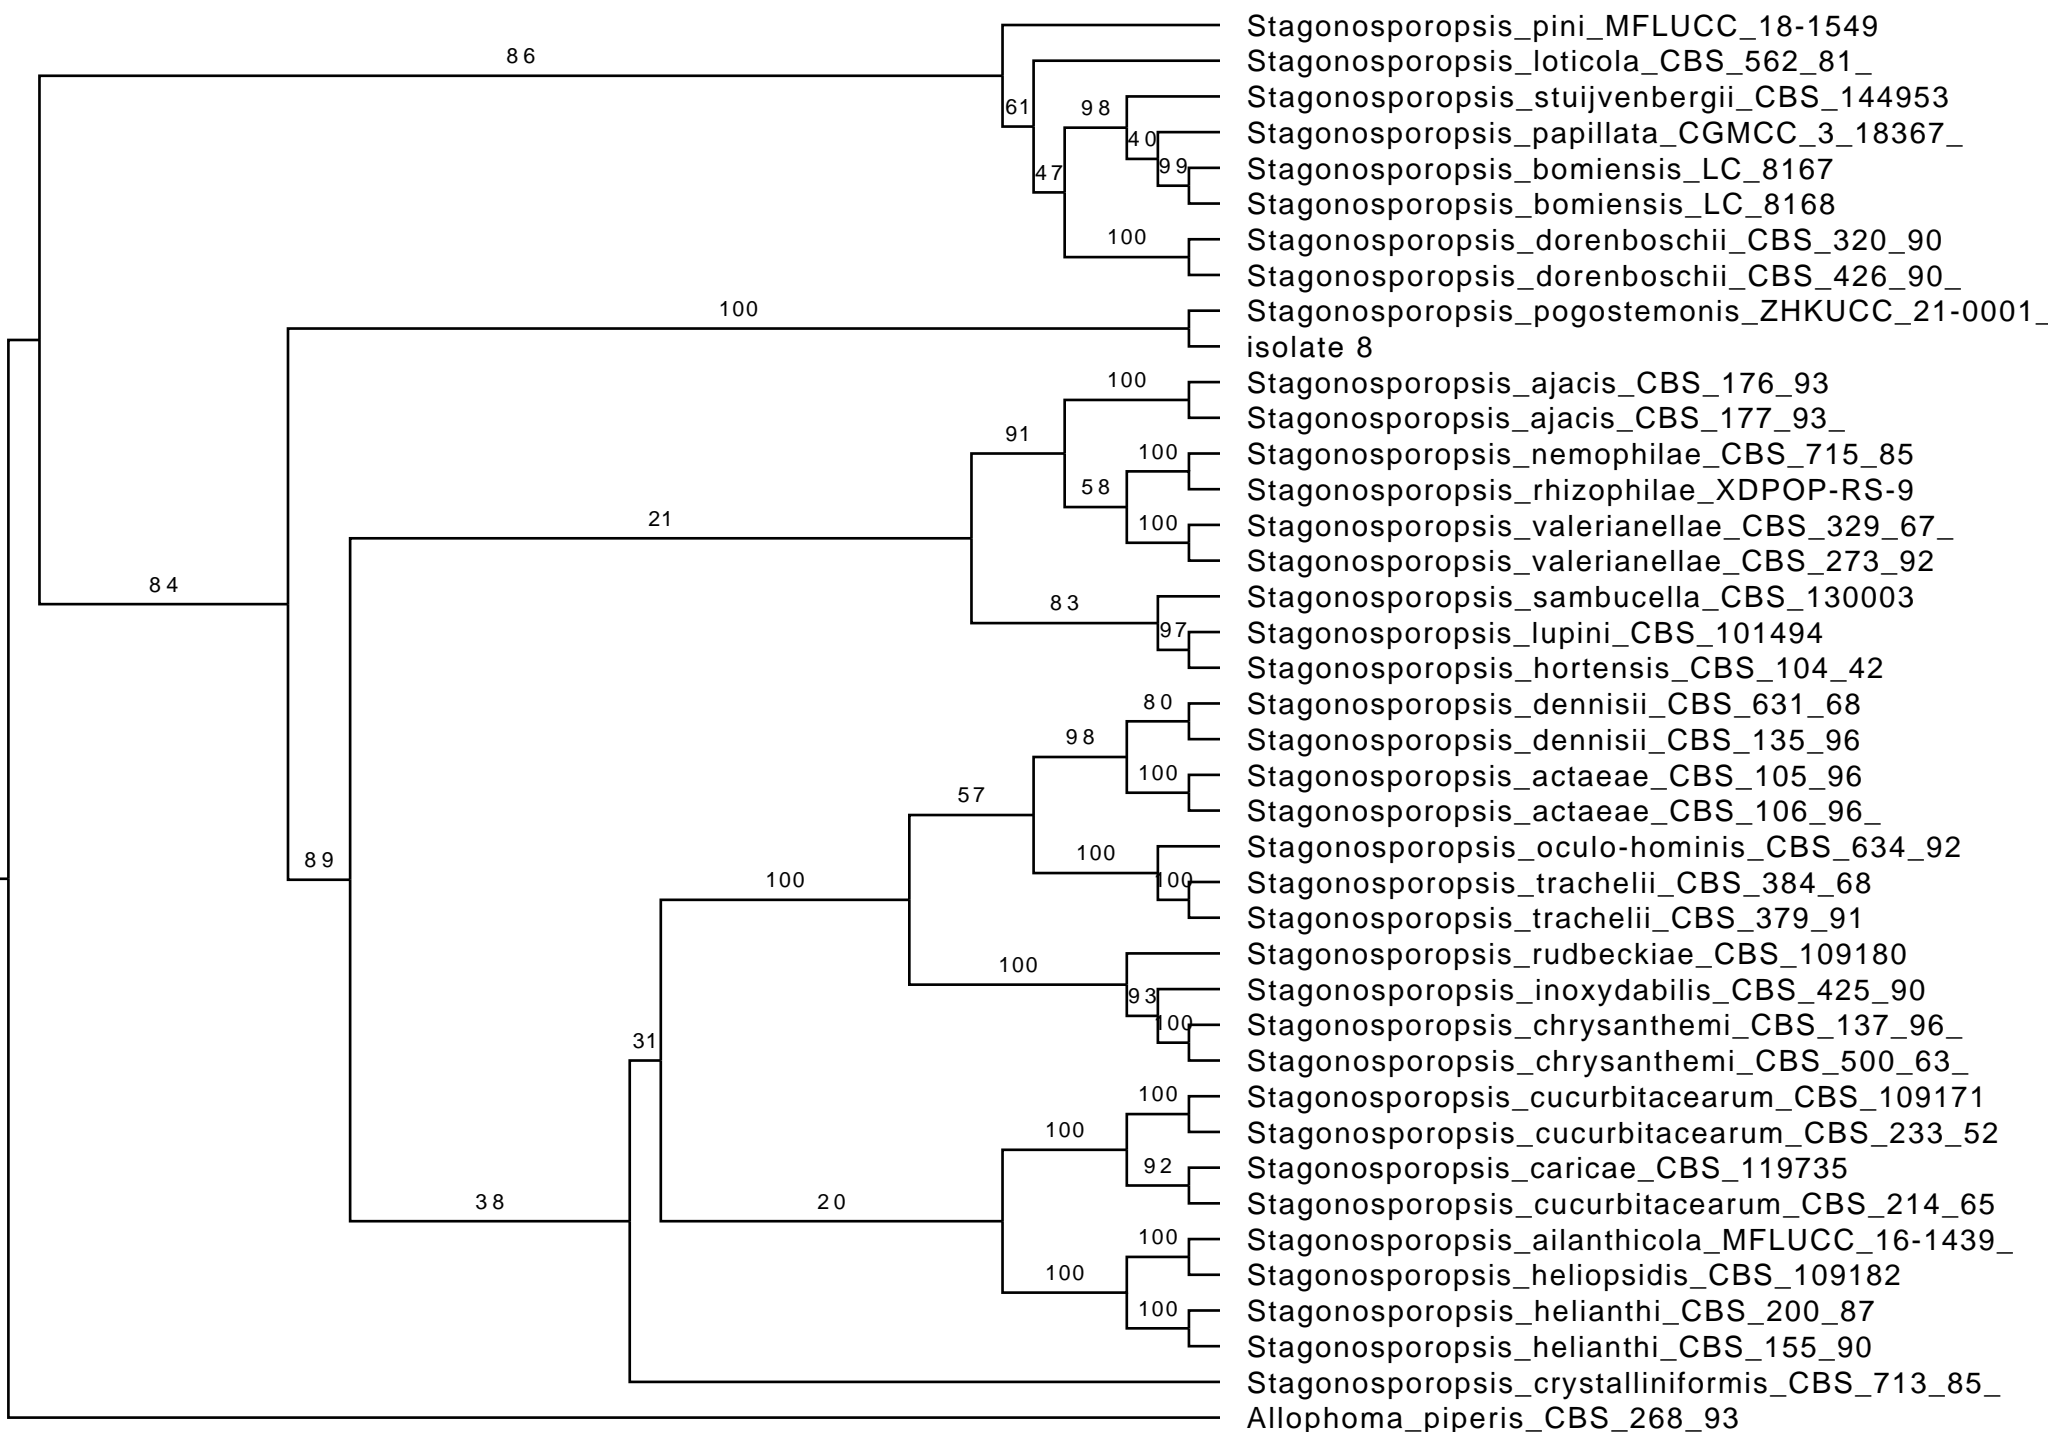

4.0

Supplement: s1 [file s1]
